# Supplementary material for: Phylogeography of the Subgenus Drosophila (Diptera: Drosophilidae): Evolutionary History of Faunal Divergence between the Old and the New Worlds
Source: PubMed Central journal article supplement (PMC4962979; doi:10.1371/journal.pone.0160051), 2016-07-27
Supplement: pone.0160051.s002.pdf [file pone.0160051.s002.pdf]

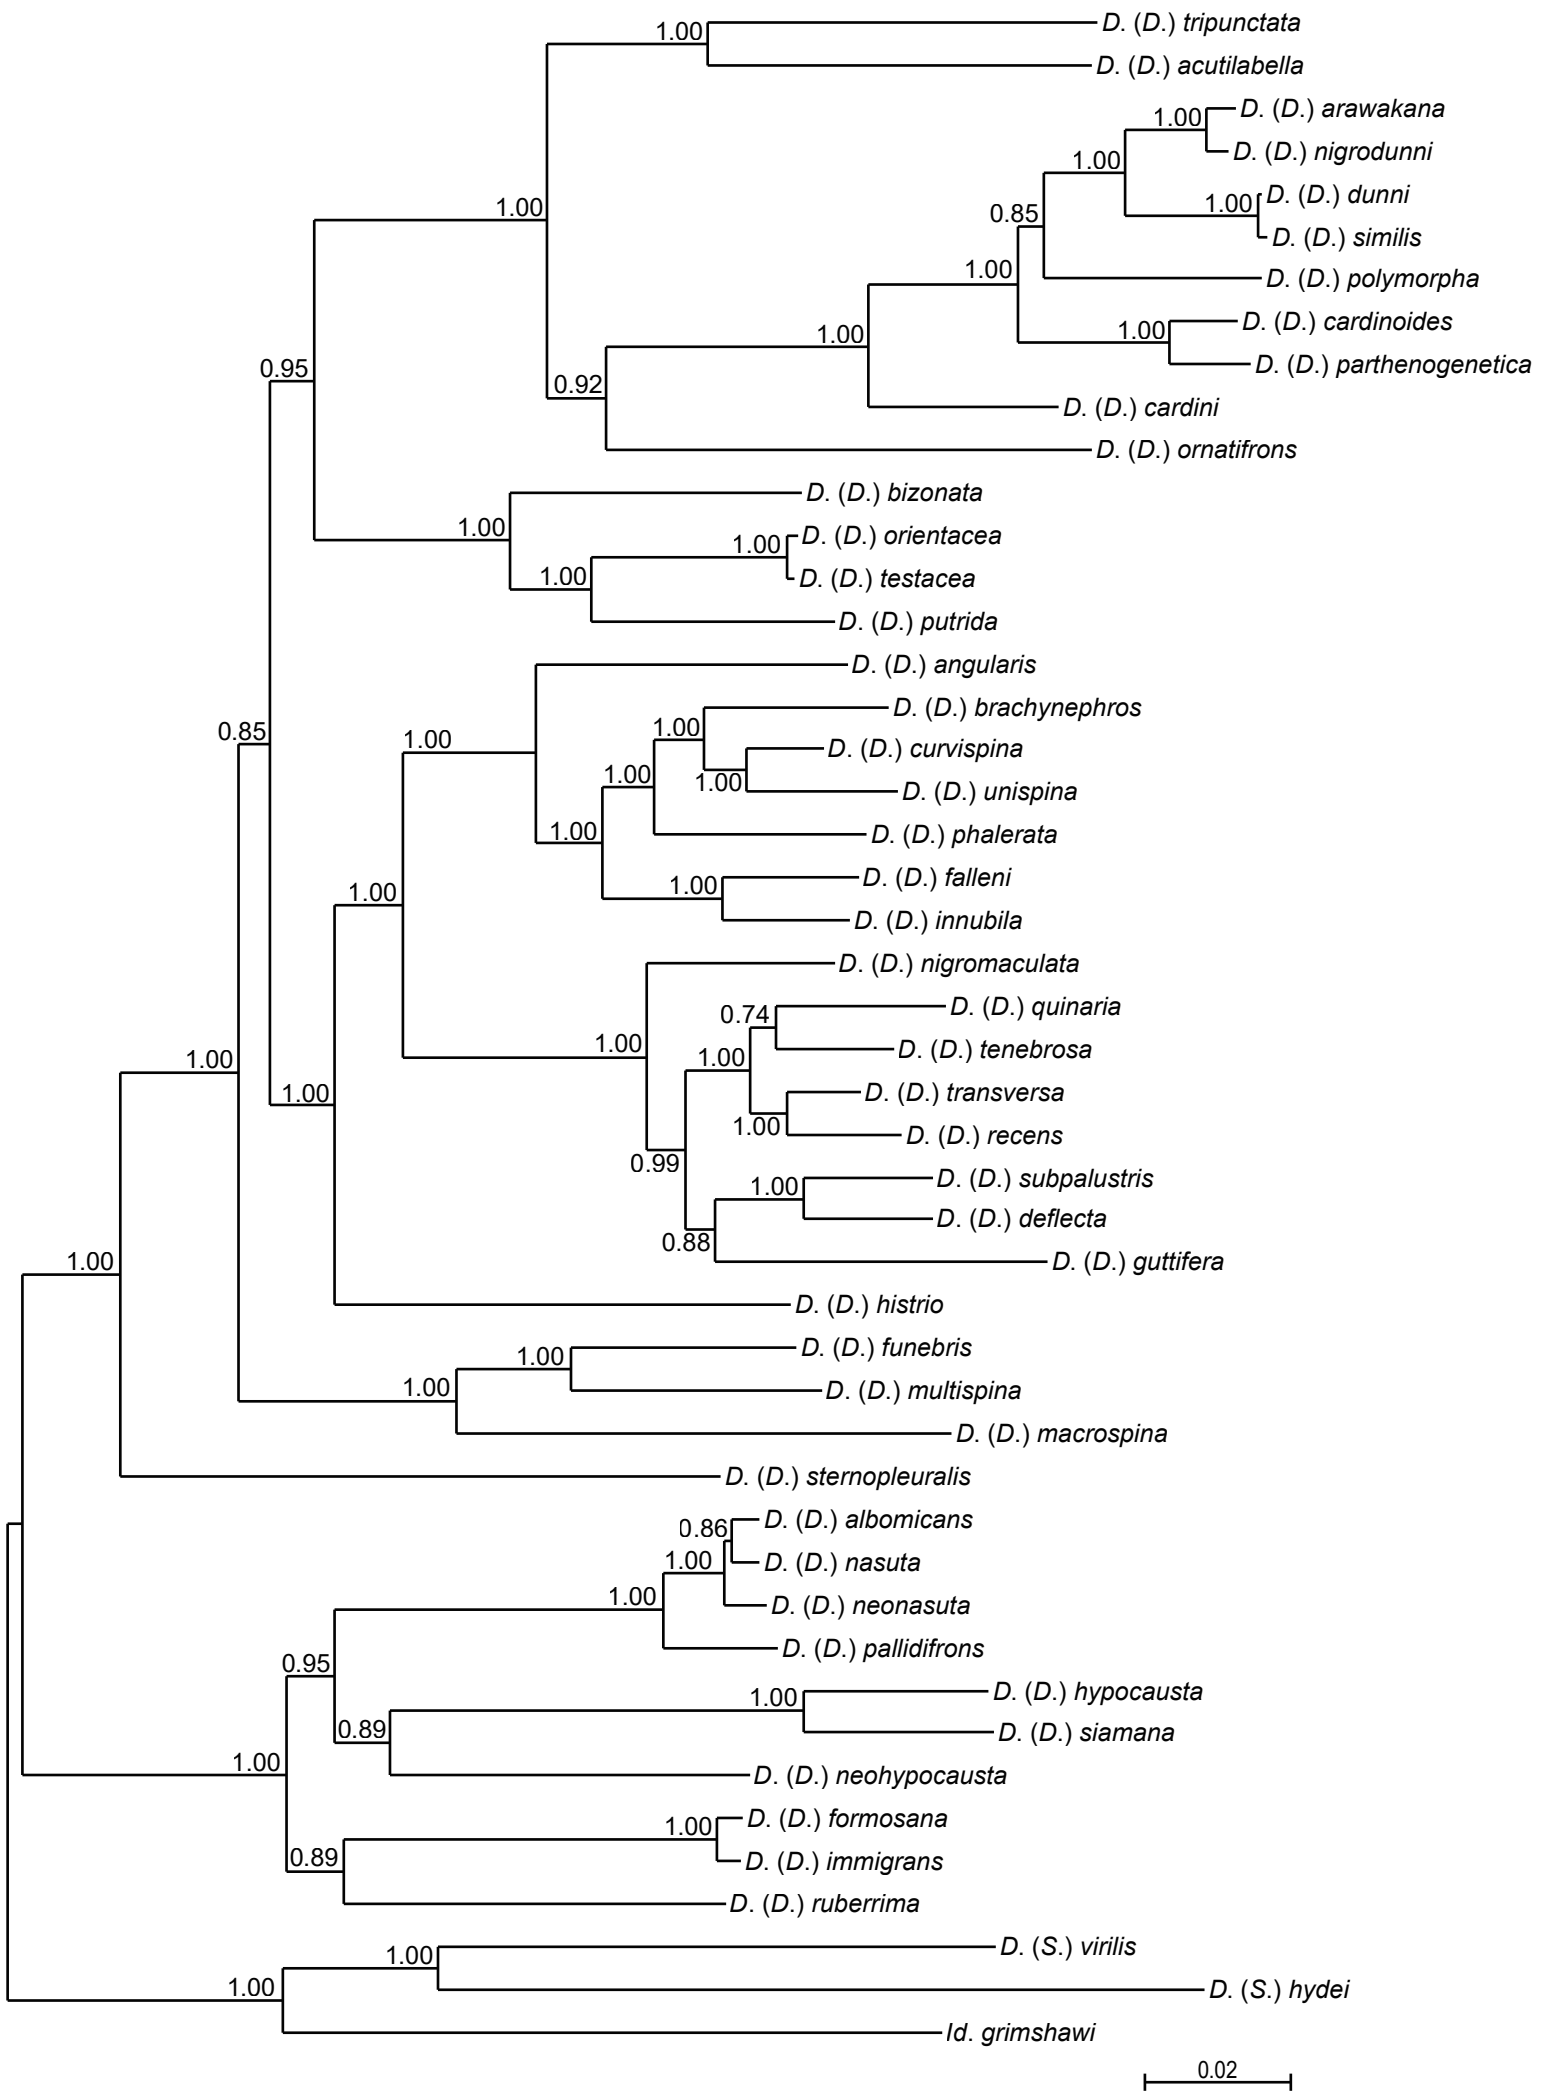

S1 Fig. Phylogenetic tree constructed by the Bayesian Binary MCMC analysis of the concatenated dataset.
